# Supplementary material for: Analysis and Prediction of Hydrothermally Synthesized ZnO-Based Dye-Sensitized Solar Cell Properties Using Statistical and Machine-Learning Techniques
Source: PubMed Central journal article supplement — ACS Omega. 2021 Oct 26;6(44):29982–92. doi: 10.1021/acsomega.1c04521 (PMC8582059; doi:10.1021/acsomega.1c04521), 2021-10-26
Supplement: ao1c04521_si_001.pdf [file ao1c04521_si_001.pdf]

# Supporting Information

## Analysis and prediction of hydrothermally synthesized ZnO based dye-sensitized solar cells properties using statistical and machine learning techniques

Santosh S. Sutar <sup>1</sup>, Suvarna M. Patil <sup>2</sup>, Sunil J. Kadam <sup>3</sup>,

Rajanish K. Kamat <sup>4</sup>, Deok-kee Kim<sup>5,\*</sup>, Tukaram D. Dongale <sup>6,\*</sup>

<sup>1</sup> Yashwantrao Chavan School of Rural Development, Shivaji University, Kolhapur, 416004, India

<sup>2</sup> Institute of Management, Bharati Vidyapeeth Deemed to be University, Sangli-416 416, India

<sup>3</sup> Department of Mechanical Engineering, Bharati Vidyapeeth's College of Engineering, Kolhapur-416 013, India

<sup>4</sup> Department of Electronics, Shivaji University, Kolhapur, 416004, India

<sup>5</sup> Department of Electrical Engineering, Sejong University, 209 Neungdong-ro, Gwangjin-gu, Seoul 05006, South Korea

<sup>6</sup> Computational Electronics and Nanoscience Research Laboratory, School of Nanoscience and Biotechnology, Shivaji University, Kolhapur, 416004, India

**\*Corresponding Author's Email:** [tdd.snst@unishivaji.ac.in](mailto:tdd.snst@unishivaji.ac.in) (Dr. Tukaram D. Dongale) and [deokkeekim@sejong.ac.kr](mailto:deokkeekim@sejong.ac.kr) (Dr. Deok-kee Kim)

Table S1: Dataset used in the present investigation

| Structure     | Precursor | Dye | Synthesis temperature (°c) | Synthesis time (h) | Seed layer | Electrical parameter (Efficiency or PCE) | Reference |
|---------------|-----------|-----|----------------------------|--------------------|------------|------------------------------------------|-----------|
| Microrod      | 1         | 1   | 150                        | 18                 | 0          | 0.22                                     | 1         |
| Nanosheet     |           | 1   | 150                        | 18                 | 0          | 1.47                                     |           |
| Nanorod       | 1         | 1   | 95                         | 12                 | 0          | 1.29                                     | 2         |
| Nanosphere    |           | 1   | 120                        | 12                 | 0          | 1.94                                     |           |
| Nanorod       |           | 1   | 180                        | 12                 | 0          | 1.27                                     |           |
| Nanoflower    |           | 1   | 120                        | 12                 | 0          | 1.68                                     |           |
| Nanorod       |           | 1   | 120                        | 12                 | 0          | 1.31                                     |           |
| Nanosphere    |           | 1   | 120                        | 12                 | 0          | 1.94                                     |           |
| Nanorod       |           | 1   | 120                        | 6                  | 0          | 1.29                                     |           |
| Nanosphere    |           | 1   | 120                        | 12                 | 0          | 1.94                                     |           |
| Nanorod       |           |     | 120                        | 18                 | 0          | 2.41                                     |           |
| Nanoflower    |           | 2   | 1                          | 160                | 12         | 0                                        |           |
| Nanosphere    | 1         |     | 160                        | 12                 | 0          | 2.6                                      |           |
| Nanoplates    | 1         |     | 160                        | 12                 | 0          | 1.9                                      |           |
| Nanowire      | 1         | 1   | 60                         | 24                 | 1          | 0.09                                     | 4         |
| Nanowire      |           | 1   | 70                         | 24                 | 1          | 0.17                                     |           |
| Nanowire      |           | 1   | 80                         | 24                 | 1          | 0.22                                     |           |
| Nanowire      |           | 1   | 90                         | 24                 | 1          | 0.26                                     |           |
| Nanorod       | 3         | 1   | 95                         | 40                 | 1          | 1.0                                      | 5         |
| Nanoflower    | 2         | 1   | 95                         | 30                 | 1          | 1.9                                      |           |
| Nanoforest    | 1         | 1   | 95                         | 7                  | 1          | 0.85                                     | 6         |
| Nanoforest    |           | 1   | 95                         | 7                  | 1          | 2.63                                     |           |
| Nanoparticles | 3         | 2   | 160                        | 8                  | 0          | 0.75                                     | 7         |
| Nanosheets    |           | 2   | 160                        | 3                  | 0          | 1.55                                     |           |
| Nanowire      | 2         | 1   | 85                         | 12                 | 1          | 0.42                                     | 8         |
| Nanoparticles |           | 1   | 85                         | 12                 | 1          | 0.90                                     |           |
| Nanowire      | 1         | 1   | 90                         | 10                 | 1          | 0.22                                     | 9         |
| Nanorod       | 2         | 2   | 40                         | 4                  | 1          | 0.50                                     | 10        |
| Nanorod       |           | 2   | 60                         | 4                  | 1          | 1.1                                      |           |
| Nanorod       |           | 2   | 80                         | 4                  | 1          | 1.8                                      |           |
| Nanorod       |           | 2   | 95                         | 4                  | 1          | 2.4                                      |           |
| Microsphere   | 1         | 1   | 80                         | 12                 | 1          | 3.7                                      | 11        |
| Nanorod       | 1         | 2   | 95                         | 16                 | 1          | 2.1                                      | 12        |
| Nanowire      | 1         | 3   | 92                         | 2                  | 1          | 0.093                                    | 13        |
| Nanowire      |           | 4   | 92                         | 2                  | 1          | 0.088                                    |           |
| Nanorod       | 2         | 1   | 60                         | 6                  | 1          | 1.34                                     | 14        |
| Nanobelts     | 1         | 1   | 60                         | 24                 | 0          | 1.28                                     | 15        |
| Nanoplates    |           | 1   | 100                        | 24                 | 0          | 1.58                                     |           |

|               |   |   |     |    |    |       |    |
|---------------|---|---|-----|----|----|-------|----|
| Nanoplates    |   | 1 | 140 | 24 | 0  | 1.75  |    |
| Nanorods      |   | 1 | 180 | 24 | 0  | 2.00  |    |
| Nanocrystal   | 2 | 4 | 160 | 1  | 0  | 4.56  | 16 |
| Nanorods      | 1 | 1 | 96  | 6  | 1  | 0.56  | 17 |
| Nanorods      |   | 1 | 96  | 12 | 1  | 0.76  |    |
| Nanorods      |   | 1 | 96  | 22 | 1  | 0.92  |    |
| Nanorods      |   | 1 | 96  | 28 | 1  | 0.89  |    |
| Nanorods      |   | 1 | 150 | 6  | 1  | 0.51  |    |
| Nanorods      |   | 1 | 150 | 12 | 1  | 0.63  |    |
| Nanorods      |   | 1 | 150 | 22 | 1  | 1.08  |    |
| Nanorods      |   | 1 | 150 | 28 | 1  | 1.32  |    |
| Nanorods      |   | 3 | 1   | 95 | 48 | 1     |    |
| Nanowire      | 3 | 1 | 95  | 16 | 1  | 1.70  |    |
| Nanorod       | 2 | 1 | 180 | 10 | 1  | 2.81  | 20 |
| Nanorod       |   | 1 | 180 | 10 | 1  | 2.21  |    |
| Nanorod       |   | 1 | 180 | 10 | 1  | 2.07  |    |
| Nanomushrooms | 1 | 2 | 150 | 3  | 0  | 2.38  | 21 |
| Nanorod       |   | 2 | 85  | 3  | 0  | 1.41  |    |
| Nanorod       | 2 | 3 | 65  | 2  | 1  | 0.42  | 22 |
| Nanorod       |   | 3 | 70  | 2  | 1  | 0.33  |    |
| Nanorod       |   | 3 | 80  | 2  | 1  | 0.25  |    |
| Microsphere   | 1 | 2 | 100 | 10 | 0  | 0.34  | 23 |
| Nanoplates    | 2 | 1 | 130 | 10 | 0  | 5.05  | 24 |
| Nanoflower    | 1 | 1 | 120 | 24 | 0  | 1.37  | 25 |
| Nanorod       |   | 1 | 120 | 24 | 0  | 0.19  |    |
| Nanorod       | 1 | 1 | 60  | 4  | 1  | 0.005 | 26 |
| Nanorod       |   | 1 | 70  | 4  | 1  | 0.04  |    |
| Nanorod       |   | 1 | 90  | 4  | 1  | 0.12  |    |
| Nanorod       |   | 1 | 100 | 4  | 1  | 0.31  |    |
| Nanograss     | 1 | 1 | 90  | 48 | 1  | 0.40  | 27 |
| Nanorod       | 1 | 1 | 90  | 6  | 1  | 0.52  | 28 |
| Nanorod       |   | 1 | 90  | 6  | 1  | 0.91  |    |
| Nanorod       | 1 | 1 | 60  | 24 | 1  | 0.70  | 29 |
| Nanowire      | 1 | 1 | 92  | 30 | 1  | 0.69  | 30 |
| Nanoparticles | 3 | 1 | 160 | 3  | 0  | 3.13  | 31 |
| Nano Flake    | 3 | 1 | 160 | 6  | 0  | 5.72  |    |
| Nanotubes     | 2 | 2 | 120 | 16 | 0  | 1.10  | 32 |
| Nanowires     | 3 | 2 | 150 | 24 | 0  | 0.99  |    |
| Microrod      | 1 | 5 | 97  | 2  | 0  | 0.021 | 33 |
| Nanorod       | 1 | 5 | 97  | 2  | 0  | 0.022 |    |
| Nanoplates    | 1 | 5 | 97  | 2  | 0  | 0.049 |    |
| Nanoplates    | 1 | 5 | 97  | 2  | 0  | 0.100 |    |
| Nanoparticles | 1 | 5 | 97  | 2  | 0  | 0.160 |    |
| Nanoparticles | 1 | 5 | 97  | 2  | 0  | 0.180 |    |
| Nanorod       | 1 | 5 | 90  | 15 | 1  | 1.1   | 34 |

|               |   |   |     |      |   |      |    |
|---------------|---|---|-----|------|---|------|----|
| Nanostar      | 1 | 1 | 160 | 6    | 0 | 1.13 | 35 |
| Nanorod       | 2 | 5 | 200 | 4    | 0 | 4.12 | 36 |
| Nanorod       | 2 | 5 | 200 | 4    | 0 | 4.62 |    |
| Nanorod       | 2 | 5 | 200 | 4    | 0 | 2.47 |    |
| Nanorod       | 2 | 5 | 200 | 4    | 0 | 2.76 |    |
| Nanowire      | 2 | 1 | 200 | 1.5  | 1 | 1.55 | 37 |
| Nanoparticles | 2 | 5 | 160 | 3    | 0 | 0.58 | 38 |
| Nanoflakes    | 3 | 1 | 130 | 12   | 0 | 3.39 | 39 |
| Nanoparticles | 3 | 5 | 150 | 4    | 0 | 1.1  | 40 |
| Nanowire      | 2 | 1 | 90  | 2.5  | 1 | 1    | 41 |
| Microrod      | 2 | 1 | 90  | 6    | 1 | 0.03 | 42 |
| Nanorod       | 2 | 5 | 200 | 7    | 0 | 3.93 | 43 |
| Nanorod       | 2 | 5 | 200 | 7    | 0 | 4.53 |    |
| Nanorod       | 2 | 5 | 200 | 7    | 0 | 5.32 |    |
| Nanorod       | 2 | 5 | 200 | 7    | 0 | 6.07 |    |
| Nanorod       | 1 | 1 | 90  | 26.5 | 1 | 1.65 | 44 |
| Nanorod       | 2 | 1 | 90  | 1    | 1 | 0.16 | 45 |
| Nano Bead     | 2 | 1 | 120 | 24   | 0 | 3.56 | 46 |
| Microrod      | 1 | 4 | 90  | 12   | 1 | 2.21 | 47 |
| Microrod      | 1 | 1 | 160 | 24   | 0 | 0.86 | 48 |
| Nanoflower    | 1 | 1 | 95  | 8    | 1 | 1.08 | 49 |
| Nanoflower    | 1 | 1 | 95  | 8    | 1 | 2.23 |    |
| Nanorod       | 1 | 1 | 90  | 2    | 1 | 0.25 | 50 |
| Nanocrystal   | 2 | 4 | 150 | 0.5  | 0 | 3.92 | 51 |
| Nanopyramid   | 2 | 4 | 100 | 0.5  | 0 | 2.82 |    |
| Nanosheet     | 2 | 4 | 180 | 0.5  | 0 | 2.80 |    |
| Nanocrystal   | 2 | 5 | 150 | 0.5  | 0 | 1.38 |    |
| Nanopyramid   | 2 | 5 | 100 | 0.5  | 0 | 1.33 |    |
| Nanosheet     | 2 | 5 | 180 | 0.5  | 0 | 0.39 |    |
| Nanoparticles | 2 | 5 | 160 | 3    | 0 | 0.94 | 52 |
| Nanosheet     | 2 | 1 | 120 | 3    | 1 | 3.23 | 53 |
| Nanowires     | 1 | 1 | 80  | 1    | 1 | 0.82 | 54 |
| Nanodisk      | 3 | 1 | 75  | 3    | 0 | 1.94 | 55 |
| Nanorod       | 1 | 1 | 100 | 5    | 0 | 2.4  | 56 |
| Nanorod       | 1 | 1 | 100 | 5    | 0 | 0.39 |    |
| Nanoparticles | 1 | 1 | 100 | 5    | 0 | 3.51 |    |
| Nanorod       | 2 | 1 | 180 | 10   | 0 | 2.81 | 57 |
| Nanoparticles | 2 | 1 | 100 | 10   | 0 | 2.07 |    |
| Nanowires     | 1 | 1 | 92  | 2.5  | 1 | 1    | 58 |
| Microspheres  | 1 | 1 | 105 | 1    | 0 | 5.78 | 59 |
| Microspheres  | 1 | 1 | 105 | 2    | 0 | 7.66 |    |
| Nanorod       | 1 | 1 | 95  | 2    | 1 | 0.22 | 60 |
| Nanorod       | 1 | 1 | 95  | 10   | 1 | 0.10 |    |
| Nanosheet     | 1 | 1 | 130 | 2    | 0 | 1.57 | 61 |
| Nanotube      | 1 | 1 | 90  | 8    | 1 | 0.37 | 62 |

|               |   |   |      |     |   |       |    |
|---------------|---|---|------|-----|---|-------|----|
| Nanorod       | 1 | 1 | 90   | 8   | 1 | 0.34  |    |
| Nanorod       | 1 | 1 | 150  | 4   | 0 | 1.90  | 63 |
| Nanoparticles | 1 | 1 | 70   | 0.5 | 0 | 1.25  | 64 |
| Nanosheet     | 1 | 1 | 150  | 8   | 0 | 3.39  | 65 |
| Nanorod       | 2 | 1 | 95   | 8   | 1 | 1.23  | 66 |
| Nanorod       | 2 | 1 | 92   | 5   | 1 | 1.8   | 67 |
| Nanorod       | 1 | 1 | 90   | 9   | 1 | 0.28  | 68 |
| Nanorod       | 1 | 1 | 90   | 18  | 1 | 0.42  |    |
| Nanorod       | 1 | 1 | 90   | 27  | 1 | 0.64  |    |
| Microflower   | 2 | 1 | 150  | 10  | 0 | 4.52  | 69 |
| Microflower   | 2 | 1 | 150  | 10  | 0 | 4.13  |    |
| Microflower   | 2 | 1 | 150  | 10  | 0 | 4.23  |    |
| Nanowires     | 1 | 1 | 95   | 3   | 1 | 0.49  | 70 |
| Microorod     | 1 | 1 | 95   | 8   | 1 | 0.20  | 71 |
| Microorod     | 1 | 1 | 95   | 12  | 1 | 0.26  |    |
| Microorod     | 1 | 1 | 95   | 24  | 1 | 0.12  |    |
| Nanoflower    | 1 | 1 | 175  | 24  | 0 | 5.11  | 72 |
| Nanowires     | 1 | 1 | 175  | 24  | 0 | 2.1   | 73 |
| Nanowires     | 1 | 2 | 175  | 24  | 0 | 1.4   |    |
| Microrods     | 1 | 1 | 90   | 3   | 0 | 0.41  | 74 |
| Microspheres  | 1 | 1 | 90   | 3   | 0 | 1.42  |    |
| Microspheres  | 1 | 1 | 90   | 3   | 0 | 0.79  |    |
| Nanowires     | 1 | 1 | 150  | 5   | 1 | 1.25  | 75 |
| Nanomushrooms | 1 | 1 | 150  | 3   | 1 | 2.38  | 76 |
| Nanorod       | 1 | 1 | 85   | 3   | 1 | 1.41  |    |
| Nanourchin    | 1 | 5 | 91.5 | 3   | 1 | 6.40  | 77 |
| Nanorod       | 1 | 5 | 85   | 4   | 1 | 0.22  | 78 |
| Nanorod       | 1 | 5 | 85   | 4   | 1 | 0.08  |    |
| Nanorod       | 1 | 5 | 85   | 4   | 1 | 0.12  |    |
| Nanoneedles   | 1 | 1 | 100  | 5   | 0 | 0.24  | 79 |
| Nanoflower    | 1 | 1 | 100  | 5   | 0 | 0.85  |    |
| Nanocluster   | 1 | 1 | 100  | 5   | 0 | 2.22  |    |
| Nanowires     | 1 | 5 | 200  | 1.5 | 1 | 0.79  | 80 |
| Nanorod       | 2 | 1 | 100  | 12  | 0 | 4.7   | 81 |
| Nanowires     | 1 | 1 | 95   | 3   | 1 | 0.78  | 82 |
| Nanowires     | 1 | 1 | 95   | 3   | 1 | 1.78  |    |
| Nanorod       | 1 | 1 | 96   | 6   | 1 | 0.53  | 83 |
| Nanorod       | 1 | 1 | 96   | 4   | 1 | 0.33  |    |
| Nanorod       | 1 | 1 | 96   | 2   | 1 | 0.21  |    |
| Nanorod       | 1 | 1 | 80   | 4   | 1 | 0.065 | 84 |
| Nanorod       | 1 | 1 | 80   | 8   | 1 | 0.133 |    |
| Nanorod       | 1 | 1 | 80   | 12  | 1 | 0.186 |    |
| Nanorod       | 1 | 1 | 80   | 24  | 1 | 0.221 |    |
| Nanosheet     | 1 | 1 | 90   | 10  | 1 | 2.51  | 85 |
| Nanorod       | 1 | 1 | 95   | 2   | 1 | 0.08  | 86 |

|                   |   |   |     |    |   |       |     |
|-------------------|---|---|-----|----|---|-------|-----|
| Nanorod           | 1 | 1 | 95  | 4  | 1 | 0.27  |     |
| Nanorod           | 1 | 1 | 95  | 8  | 1 | 1.27  |     |
| Nanorod           | 1 | 1 | 95  | 4  | 1 | 0.04  | 87  |
| Nanorod           | 1 | 1 | 95  | 6  | 1 | 0.09  |     |
| Nanorod           | 1 | 1 | 95  | 72 | 1 | 0.47  |     |
| Microarchitecture | 1 | 1 | 90  | 3  | 0 | 0.54  | 88  |
| Microflowers      | 1 | 1 | 100 | 3  | 0 | 3.98  | 89  |
| Microsheet        | 1 | 1 | 120 | 3  | 0 | 5.16  |     |
| Nanosheet         | 1 | 1 | 180 | 3  | 0 | 3.11  |     |
| Nanotubes         | 1 | 1 | 95  | 3  | 1 | 1.44  | 90  |
| Nanowires         | 2 | 1 | 90  | 9  | 1 | 0.98  | 91  |
| Nanowires         | 2 | 1 | 99  | 9  | 1 | 0.45  |     |
| Microflower       | 2 | 1 | 90  | 9  | 1 | 0.70  |     |
| Microurchin       | 2 | 1 | 90  | 9  | 1 | 1.21  |     |
| Microurchin       | 2 | 1 | 90  | 9  | 1 | 1.92  |     |
| Nanobelt          | 1 | 1 | 120 | 1  | 1 | 1.36  | 92  |
| Nanobelt          | 1 | 1 | 120 | 2  | 1 | 2.09  |     |
| Nanobelt          | 1 | 1 | 120 | 3  | 1 | 3.28  |     |
| Nanoparticles     | 2 | 1 | 150 | 4  | 0 | 4.45  | 93  |
| Microsphere       | 1 | 1 | 160 | 2  | 0 | 2.34  | 94  |
| Nanoflower        | 1 | 1 | 70  | 4  | 0 | 3.6   | 95  |
| Nanotree          | 1 | 1 | 90  | 9  | 1 | 0.23  | 96  |
| Nanorod           | 1 | 1 | 90  | 9  | 1 | 0.20  |     |
| Nanorod           | 1 | 1 | 100 | 24 | 0 | 0.35  | 97  |
| Nanorod           | 1 | 1 | 70  | 6  | 1 | 0.67  |     |
| Nanowire          | 1 | 1 | 95  | 2  | 1 | 0.18  |     |
| Nanowire          | 1 | 1 | 95  | 4  | 1 | 0.25  | 98  |
| Nanowire          | 1 | 1 | 95  | 8  | 1 | 0.34  |     |
| Nanowire          | 1 | 1 | 95  | 16 | 1 | 0.52  |     |
| Nanowire          | 1 | 1 | 95  | 20 | 1 | 0.70  |     |
| Microsphere       | 1 | 1 | 120 | 12 | 0 | 1.76  |     |
| Microsphere       | 1 | 1 | 120 | 12 | 0 | 1.48  | 99  |
| Nanoparticle      | 1 | 1 | 75  | 24 | 0 | 1.12  | 100 |
| Nanoparticle      | 1 | 1 | 75  | 24 | 0 | 0.77  |     |
| Nanowire          | 1 | 1 | 100 | 3  | 0 | 0.30  | 101 |
| Nanowire          | 1 | 1 | 150 | 3  | 0 | 0.70  |     |
| Nanorod           | 1 | 1 | 80  | 4  | 1 | 0.06  | 102 |
| Nanorod           | 1 | 1 | 80  | 8  | 1 | 0.13  |     |
| Nanorod           | 1 | 1 | 80  | 12 | 1 | 0.18  |     |
| Nanorod           | 1 | 1 | 80  | 24 | 1 | 0.22  |     |
| Nanosheet         | 1 | 1 | 180 | 6  | 0 | 1.82  | 103 |
| Microflower       | 1 | 1 | 70  | 4  | 0 | 3.59  | 104 |
| Microflower       | 1 | 1 | 80  | 8  | 0 | 0.23  | 105 |
| Nanorod           | 2 | 1 | 90  | 10 | 1 | 1.25  | 106 |
| Nanorod           | 1 | 1 | 90  | 9  | 1 | 0.056 | 107 |

|              |   |   |      |     |   |       |     |
|--------------|---|---|------|-----|---|-------|-----|
| Nanorod      | 1 | 1 | 90   | 18  | 1 | 0.078 |     |
| Nanorod      | 1 | 1 | 90   | 27  | 1 | 0.11  |     |
| Microflower  | 1 | 1 | 120  | 10  | 0 | 1.2   | 108 |
| Nanorod      | 1 | 1 | 70   | 4   | 1 | 2.32  |     |
| Nanorod      | 1 | 1 | 80   | 4   | 1 | 2.99  |     |
| Nanorod      | 1 | 1 | 90   | 4   | 1 | 2.55  |     |
| Nanorod      | 1 | 1 | 100  | 4   | 1 | 1.98  |     |
| Nanowire     | 1 | 1 | 88   | 6   | 1 | 1.62  | 110 |
| Nanorod      | 1 | 5 | 70   | 4   | 1 | 0.33  |     |
| Nanorod      | 1 | 5 | 70   | 4   | 1 | 0.41  |     |
| Nanorod      | 1 | 5 | 70   | 4   | 1 | 0.28  |     |
| Nanorod      | 2 | 1 | 95   | 4   | 1 | 1.18  | 112 |
| Nanowire     | 1 | 2 | 95   | 3   | 1 | 0.9   | 113 |
| Nanorod      | 2 | 3 | 65   | 2   | 1 | 0.42  |     |
| Nanorod      | 2 | 3 | 70   | 2   | 1 | 0.33  |     |
| Nanorod      | 2 | 3 | 80   | 2   | 1 | 0.25  |     |
| Nanorod      | 1 | 1 | 85   | 4   | 1 | 3.25  | 115 |
| Nanograss    | 1 | 1 | 92   | 32  | 1 | 0.73  | 116 |
| Nanorod      | 1 | 2 | 83   | 0.5 | 1 | 0.58  |     |
| Nanorod      | 1 | 2 | 83   | 1   | 1 | 0.62  |     |
| Nanorod      | 1 | 2 | 83   | 1.5 | 1 | 0.79  |     |
| Nanorod      | 1 | 2 | 83   | 3   | 1 | 1.04  |     |
| Nanorod      | 1 | 1 | 95   | 24  | 1 | 0.54  | 118 |
| Nanosheet    | 1 | 1 | 95   | 24  | 1 | 0.82  | 119 |
| Nanowire     | 1 | 1 | 92.5 | 5   | 1 | 0.41  |     |
| Nanowire     | 1 | 1 | 92.5 | 10  | 1 | 0.46  |     |
| Nanowire     | 1 | 1 | 92.5 | 18  | 1 | 0.61  |     |
| Nanowire     | 1 | 1 | 92.5 | 24  | 1 | 0.63  |     |
| Nanowire     | 1 | 1 | 92.5 | 30  | 1 | 0.72  |     |
| Nanowire     | 1 | 1 | 92.5 | 40  | 1 | 0.80  |     |
| Nanowire     | 1 | 1 | 92.5 | 50  | 1 | 0.87  |     |
| Nanorod      | 1 | 1 | 90   | 6   | 1 | 0.52  | 121 |
| Nanoflower   | 2 | 2 | 180  | 2   | 0 | 1.6   | 122 |
| Nanorod      | 1 | 5 | 92   | 1   | 1 | 0.73  | 123 |
| Nanorod      | 1 | 2 | 140  | 10  | 1 | 0.08  |     |
| Nanorod      | 1 | 2 | 140  | 48  | 1 | 0.32  |     |
| Nanodisk     | 3 | 1 | 95   | 10  | 0 | 2.15  | 125 |
| Nanoparticle | 1 | 1 | 220  | 18  | 0 | 0.02  | 126 |
| Nanorod      | 1 | 1 | 90   | 24  | 1 | 1.93  | 127 |
| Nanorod      | 1 | 1 | 60   | 4   | 1 | 0.005 |     |
| Nanorod      | 1 | 1 | 70   | 4   | 1 | 0.04  |     |
| Nanorod      | 1 | 1 | 90   | 4   | 1 | 0.12  |     |
| Nanorod      | 1 | 1 | 100  | 4   | 1 | 0.31  |     |
| Nanodisk     | 3 | 1 | 95   | 10  | 0 | 2.15  | 129 |
| Nanorod      | 1 | 1 | 60   | 6   | 1 | 0.71  | 130 |

|                 |   |   |      |     |   |       |     |
|-----------------|---|---|------|-----|---|-------|-----|
| Nanowire        | 1 | 1 | 95   | 24  | 1 | 0.73  | 131 |
| Nanowire        | 1 | 1 | 95   | 48  | 1 | 0.97  |     |
| Nanowire        | 1 | 1 | 95   | 96  | 1 | 1.13  |     |
| Nanowire        | 1 | 1 | 95   | 144 | 1 | 1.31  |     |
| Nanorod         | 1 | 1 | 120  | 24  | 0 | 0.15  | 132 |
| Nanoflower      | 1 | 1 | 120  | 24  | 0 | 1.37  |     |
| Nanowire        | 3 | 4 | 150  | 12  | 1 | 0.66  | 133 |
| Nanoplates      | 2 | 1 | 130  | 10  | 0 | 5.05  | 134 |
| Nanowire        | 1 | 1 | 92.5 | 2.5 | 1 | 0.73  | 135 |
| Nanorod         | 1 | 1 | 80   | 4   | 1 | 0.065 | 136 |
| Nanorod         | 1 | 1 | 80   | 8   | 1 | 0.133 |     |
| Nanorod         | 1 | 1 | 80   | 12  | 1 | 0.186 |     |
| Nanorod         | 1 | 1 | 80   | 24  | 1 | 0.221 |     |
| Nanorod         | 1 | 1 | 90   | 24  | 1 | 0.84  | 137 |
| Nanowire        | 1 | 5 | 88   | 3   | 1 | 1.62  | 138 |
| Nanoflower      | 1 | 1 | 90   | 5   | 1 | 2.3   | 139 |
| Nanocone        | 1 | 5 | 80   | 3   | 1 | 1.58  | 140 |
| Nanobullets     | 2 | 1 | 150  | 10  | 0 | 1.93  | 141 |
| Nanoflakes      | 2 | 1 | 130  | 10  | 0 | 3.64  |     |
| Nanocubes       | 1 | 1 | 110  | 1   | 0 | 4.28  | 142 |
| Nanocaterpillar | 1 | 1 | 90   | 5   | 1 | 5.20  | 143 |
| Nanocrystal     | 2 | 1 | 100  | 48  | 0 | 1.04  | 144 |
| Nanocrystal     | 2 | 1 | 100  | 48  | 0 | 2.05  |     |
| Nanoflower      | 1 | 5 | 145  | 3   | 0 | 1.38  | 145 |
| Nanotubes       | 1 | 1 | 85   | 3   | 1 | 2.2   | 146 |
| Nanowire        | 1 | 1 | 92   | 3   | 1 | 0.70  | 147 |
| Nanorods        | 2 | 5 | 200  | 36  | 0 | 1.66  | 148 |
| Nanorods        | 1 | 1 | 92   | 2.5 | 1 | 2.17  | 149 |
| Nanorods        | 1 | 5 | 70   | 5   | 1 | 0.67  | 150 |
| Nanorods        | 1 | 5 | 70   | 4   | 1 | 0.29  | 151 |
| Nanorods        | 1 | 5 | 70   | 6   | 1 | 0.37  |     |
| Nanorods        | 1 | 5 | 70   | 8   | 1 | 0.53  |     |
| Nanorods        | 1 | 5 | 70   | 10  | 1 | 0.76  |     |
| Nanorods        | 1 | 3 | 90   | 5   | 1 | 1.06  | 152 |
| Nanorods        | 1 | 4 | 90   | 5   | 1 | 0.95  |     |

**Precursors:** Zinc Nitrate- 1; Zinc Acetate- 2; Zinc Chloride- 3

**Dyes:** Dye 1: N719; Dye 2: N3; Dye 3: D102; Dye 4: D149; Dye 5: Natural Dye, Rodhamine B, Eosin-Y, D205, Mercurochrome, Z907, LEG-4, and C-218

**Seed Layer:** 0- Absent; 1: Present

**In some instances, the authors' domain knowledge was applied to complete missing information.**



## Details of the decision tree, random forest, and artificial neural network algorithms

Classification and clustering are two basic data analysis tools. Classification is a procedure to build a model that describes and distinguishes data labels. Whereas clustering analyzes data objects without consulting class labels and is used to generate class labels for group data [153]. In general, the data is partitioned into two subsets namely training data and test data. The training data are used to build the model and test data can be used to test the accuracy of the proposed model. In short, it is a two-step procedure, where learning from the model (building a model from training data) is the first step and classification/clustering step (prediction of class labels). In the case of classification, the model is used to class labels of the objects. Whereas in the case of clustering, the group of objects is taken together to form a cluster in such a way that the similarities with the cluster are maximum and among the clusters is minimum. Clustering can be used to generate the class labels for a group of data points.

Decision tree and neural network are two effective tools of classification. The decision tree is used to identify possible rules and heuristics. We have used this technique to identify the factors and conditions leading to different classes and develop some heuristics. In the case of supervised learning, i.e. when efficiency class labels are known we can get four classes. In unsupervised learning, the Classification and Regression Tree (CART) model has split into four clusters viz. very high efficiency, high efficiency, low efficiency, and very low efficiency. The classification rules can be extracted through a decision tree. The structure of a decision is shown the Figure S1.

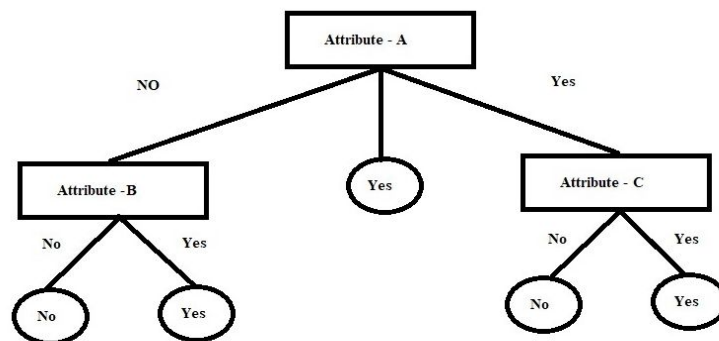

Figure S1. Structure of Decision Tree

Random Forest is the collection of decision tree classifiers [153-154]. It is an ensemble method used to increase overall accuracy by learning and combination of a series of individual tree classifier models. In the case of machine learning methodology, the variables are always termed as attributes. Thus, the selection of the attributes and the splitting rules are the two main concerns of this case. The ranking for each attribute is provided by the selection measures such as Information Gain, Gain Ratio, and Gini Index. Based on the value of these measures the splitting rule, also known as a classifier is constructed.

There are few metrics available for the performance evaluation of classifiers. The metrics or measures are defined in the following terms. For a given classifier, True Positive (TP) number denotes the true classes correctly classified as true. True Negative (TN) number is the number of wrong classes correctly classified as wrong. Whereas False Positive (FP) number denotes the wrong classes classified as true and that of False Negative (FN) number is the number of positive classes classified as wrong ones. Based on the term the confusion matrix is constructed, as shown in Table S2.

Table S2: Confusion Matrix

| Actual Class | Predicted Class |      |       |
|--------------|-----------------|------|-------|
|              |                 | True | Wrong |
| True         |                 | TP   | FN    |
| Wrong        |                 | FP   | TN    |

The evaluation measures such as accuracy (equation 1) and error (misclassification) rate (equation 2) are defined as,

$$Accuracy = \frac{TP + TN}{Total\ Number\ of\ Classes} \quad (1)$$

$$Error\ Rate = \frac{FP + FN}{Total\ Number\ of\ Classes} \quad (2)$$

The accuracy measures the proportion of correctly classified classes by the classifier and the proportion of wrongly classified classes as error rate or rate of misclassification. The

sensitivity is referred to the proportion of true classes that are correctly classified and the proportion of wrong classes that are correctly classified as specificity.

The Artificial Neural Network (ANN) is used for both classification (to predict the class label of a given tuple) and numeric prediction (to predict a continuous-value output). It is a tool for analyzing big data. The more complex model can be build and used for prediction and pattern recognition. ANN mimics the behavior of the human brain to solve complex data-driven problems. It behaves similarly to the neural networks in the human brain and it functions when input data is fed to it and then this data is processed via layers of perceptrons to produce the desired output. This model generally consists of three layers namely the input layer, the hidden layer, and the output layer. The typical structure and block diagram of ANN is as shown in Figure S2 and S3, respectively. The information is propagated through neurons from the input layer to the output layer via hidden layers.

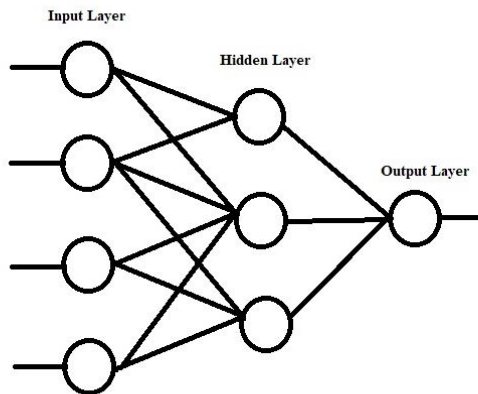

Figure S2: Structure of an artificial neural network

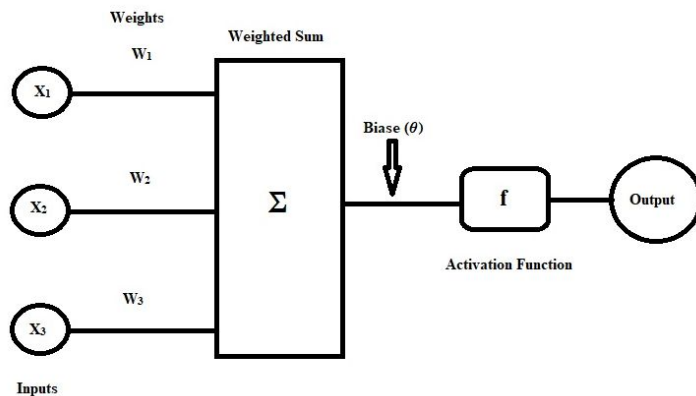

Figure S3: Block diagram of ANN

In the case of a neural network, the outputs of a hidden layer act as the inputs of the next layer. The net input of the hidden layer can be computed as the linear combination of inputs. Thus input of  $j^{\text{th}}$  element of a hidden layer in terms of weights ( $w_{ij}$ ) and output of  $i^{\text{th}}$  element and Bias ( $\theta_j$ ) can be defined using equation 3.

$$\text{Input of } j^{\text{th}} \text{ element} = \left\{ \sum_i w_{ij} \times (\text{Output of } i^{\text{th}} \text{ element}) \right\} + \theta_j \quad (3)$$

The functioning of ANN is represented in Figure S3. The logistic or sigmoid function can be used as an activation function.

## References

1. Fang, J.; Fan, H.; Tian, H.; Dong, G. Morphology control of ZnO nanostructures for high efficient dye-sensitized solar cells. *Mater. Charact.* **2015**, *108*, 51-57.
2. Meng, Y.; Lin, Y.; Yang, J. Synthesis of rod-cluster ZnO nanostructures and their application to dye-sensitized solar cells. *Appl. Surf. Sci.* **2013**, *268*, 561-565.
3. Akhtar, M. S.; Khan, M. A.; Jeon, M.; S. & Yang, O. B. Controlled synthesis of various ZnO nanostructured materials by capping agents-assisted hydrothermal method for dye-sensitized solar cells. *Electrochim.Acta.* **2008**, *53*(27), 7869-7874.
4. Jung, J.; Myoung, J.; & Lim, S. Effects of ZnO nanowire synthesis parameters on the photovoltaic performance of dye-sensitized solar cells. *Thin solid films.* **2012**, *520*(17), 5779-5789.
5. Jiang, C.; Y, Sun.; X. W., Lo.; G. Q., Kwong, D.; L., & Wang, J.; X. Improved dye-sensitized solar cells with a ZnO-nanoflower photoanode. *Int. J. Appl. Phys.* **2007**, *90*(26), 263501.
6. Ko, S.; H. Lee, D.; Kang, H.; W. Nam, K.; H. Yeo, J.; Y. Hong, S.; J. & Sung, H.; J. Nanoforest of hydrothermally grown hierarchical ZnO nanowires for a high efficiency dye-sensitized solar cell. *Nano Lett.* **2011**, *11*(2), 666-671.
7. Suliman, A.; E. Tang, Y.; & Xu, L. Preparation of ZnO nanoparticles and nanosheets and their application to dye-sensitized solar cells. *Sol. Energy Mater Sol. Cells* **2007**, *91*(18), 1658-1662.
8. Jiang, C.; Y. Sun, X. W.; Tan, K. W.; Lo, G. Q.; Kyaw, A.; K. K., & Kwong,; D. L. High-bendability flexible dye-sensitized solar cell with a nanoparticle-modified ZnO-nanowire electrode. *Int. J. Appl. Phys.* **2008**, *92*(14), 143101.
9. Hsu, Y.; F. Xi, Y.; Y. Djurišić, A.; B. & Chan, W.; K. ZnO nanorods for solar cells: hydrothermal growth versus vapor deposition. *Int. J. Appl. Phys.* **2008**, *92*(13), 133507.
10. Guo, M.; Diao, P.; Wang, X.; & Cai, S. The effect of hydrothermal growth temperature on preparation and photoelectrochemical performance of ZnO nanorod array films. *J. Solid State Chem.* **2005**, *178*(10), 3210-3215.
11. Dong, Z.; Lai, X.; Halpert, J. E.; Yang, N.; Yi, L.; Zhai, J.; & Jiang, L. Accurate Control of Multishelled ZnO Hollow Microspheres for Dye-Sensitized Solar Cells with High Efficiency. *J. Adv.Mater.* **2012**, *24*(8), 1046-1049.
12. Guo, M.; Diao, P.; & Cai, S. Hydrothermal growth of perpendicularly oriented ZnO nanorod array film and its photoelectrochemical properties. *Appl. Surf. Sci.* **2005**, *249*(1), 71-75.
13. Plank, N.; O., Howard, I.; Rao, A, Wilson, M.; W. Ducati, C.; Mane, R. S.; & Friend, R. H. Efficient ZnO Nanowire Solid-State Dye-Sensitized Solar Cells Using Organic Dyes and Core-shell Nanostructures. *J. Phys. Chem. C* **2009**, *113*(43), 18515-18522.
14. Yun, S.; Lee, J.; Chung, J.; & Lim, S. Improvement of ZnO nanorod-based dye-sensitized solar cell efficiency by Al-doping. *J. Phys. Chem. Solids* **2010**, *71*(12), 1724-1731.
15. Tellabati, N. V.; Waghadkar, Y. B.; Roy, A.; Shinde, M. D.; Gosavi, S. W.; Amalnerkar, D. P.; & Chauhan, R. Optical and photovoltaic properties of temperature-dependent synthesis

- of ZnO nanobelts, nanoplates, and nanorods. *J Solid State Electrochem* **2015**, 19(8), 2413-2420.
16. Lin, J. C., Lee, C. P., & Ho, K. C. Zinc oxide synthesis via a microemulsion technique: morphology control with application to dye-sensitized solar cells. *J. Mater. Chem.* **2012**, 22(4), 1270-1273.
  17. González Valls, I., Vertically-aligned ZnO nanostructures for excitonic solar cells. PhD Thesis, Universitat Autònoma de Barcelona (UAB) **2013**, Spain.
  18. Gao, Y., & Nagai, M. (2006). Morphology evolution of ZnO thin films from aqueous solutions and their application to solar cells. *Langmuir* **2006**, 22(8), 3936-3940.
  19. Gao, Y., Nagai, M., Chang, T. C., & Shyue, J. J. Solution-derived ZnO nanowire array film as photoelectrode in dye-sensitized solar cells. *Cryst. Growth Des.* **2007**, 7(12), 2467-2471.
  20. Zarghami, Z., Ramezani, M., & Motevalli, K. ZnO Nanorods/Nanoparticles: Novel Hydrothermal Synthesis, Characterization and Formation Mechanism for Increasing the Efficiency of Dye-Sensitized Solar Cells. *J. Clust. Sci.*, Volume 27, Issue 4, pp 1451–1462.
  21. Hossain, M. F., & Takahashi, T. Hydrothermal Synthesis of Novel ZnO Nanomushrooms for Improving the Solar Cells Performance. *IEEE TNANO.* **2014**, 13(4), 755-759.
  22. Schlur, L., Carton, A., Lévêque, P., Guillon, D., & Pourroy, G. Optimization of a new ZnO nanorods hydrothermal synthesis method for solid state dye sensitized solar cells applications. *J. Phys. Chem. C.* **2013**, 117(6), 2993-3001.
  23. Li, Z., Yu-Qing, F., Mao-Cong, Z., Min, W., Jia-Yu, Z., Chun-Xiang, X., & Yi-Ping, C. Performances of ZnO-based dye sensitized solar cells fabricated by hydrothermal synthesis and sol-gel technique. *Chin. Phys. Lett.* **2009**, 26(1), 018401.
  24. Qiu, Y., Chen, W., & Yang, S. (2010). Facile hydrothermal preparation of hierarchically assembled, porous single-crystalline ZnO nanoplates and their application in dye-sensitized solar cells. *J. Mater. Chem.* **2010**, 20(5), 1001-1006.
  25. Wang, C., Zhang, X., Wang, D., Yang, Z., Ji, W., Zhang, C., & Zhao, Y. Synthesis of nanostructural ZnO using hydrothermal method for dye-sensitized solar cells. *Sci. China Technol. Sci.* **2010**, 53(4), 1146-1149.
  26. Qin, Z., Liao, Q., Huang, Y., Tang, L., Zhang, X., & Zhang, Y. Effect of hydrothermal reaction temperature on growth, photoluminescence and photoelectrochemical properties of ZnO nanorod arrays. *Mater. Chem. Phys.* **2010**, 123(2), 811-815.
  27. Zhu, S., Wei, W., Chen, X., Jiang, M., & Zhou, Z. Hybrid structure of polyaniline/ZnO nanograss and its application in dye-sensitized solar cell with performance improvement. *J. Solid State Chem.* **2010**, 190, 174-179.
  28. Luo, Q. P., Lei, B. X., Yu, X. Y., Kuang, D. B., & Su, C. Y. Hierarchical ZnO rod-in-tube nano-architecture arrays produced via a two-step hydrothermal and ultrasonication process. *J. Mater. Chem.* **2011**, 21(24), 8709-8714.
  29. Chung, J., Lee, J., & Lim, S. Annealing effects of ZnO nanorods on dye-sensitized solar cell efficiency. *Phys. B: Condens. Matter* **2010**, 405(11), 2593-2598.

30. Yang, W., Wan, F., Chen, S., & Jiang, C. Hydrothermal growth and application of ZnO nanowire films with ZnO and TiO<sub>2</sub> buffer layers in dye-sensitized solar cells. *Nanoscale Res. Lett.* **2009**, 4(12), 1486.
31. Unni, G. E., Vineeth, V. N., Anjusree, G. S., Vadukumpully, S., Pillai, V. M., Nair, A. S., & Suresh, S. Photovoltaic Application of Rice Flake-Shaped ZnO Nanostructures. *J. Electron. Mater.* **2020**, 49, 3290–3300.
32. Rajan, A. K., & Cindrella, L. w-ZnO nanostructures with distinct morphologies: Properties and integration into dye sensitized solar cells. *Ceram. Int.* **2020**, 46(6), 8174-8184.
33. Alver, U., Kudret, A., & Kerli, S. Effect of Ethanol on the Photovoltaic Performance of ZnO Based Dye Sensitized Solar Cells. *Crystallogr. Rep.* **2019**, 64(7), 1159-1164.
34. Talib, N. H., Khalifa, N. O., Mofdal, M. E., Osman, N. M., Albushra, H. A., & Eassa, N. A. Zinc oxide (ZnO) Solar Cells Based on Dye And Polymers Materials and Dye Synthesized Solar Cells (DSSC). *ICCCEEE 2019* **2019**, (pp. 1-4). IEEE.
35. Zhang, W., Chang, S., Yao, S., & Wang, H. Preparation and Characterization of Submicron Star-Like ZnO as Light Scattering Centers for Combination with ZnO Nanoparticles for Dye-Sensitized Solar Cells. *J. Electron. Mater.* **2019**, 48(8), 4895-4901.
36. Sanjay, P., Isaivani, I., Deepa, K., Madhavan, J., & Senthil, S. The preparation of dye sensitized solar cells using natural dyes extracted from *Phytolacca icosandra* and *Phyllanthus reticulatus* with ZnO as photoanode. *Mater. Lett.* **2019**, 244, 142-146.
37. Guo, H., Ding, R., Li, N., Hong, K., Liu, L., & Zhang, H. Defects controllable ZnO nanowire arrays by a hydrothermal growth method for dye-sensitized solar cells. *Phys. E: Low-Dimens. Syst. Nanostructures* **2019**, 105, 156-161.
38. Musleh, H., Zayed, H., Shaat, S., Al-Kahlout, A., Tamous, H., Issa, A., & AlDahoudi, N. Enhancement of the performance of dye-sensitized solar cells using sensitized zinc oxide nanoparticles by rhodamine B dye. *Egypt. J. Chem.* **2019**, 62(The First International Conference on Molecular Modeling and Spectroscopy 19-22 February, 2019), 111-123.
39. Han, S. Y., Akhtar, M. S., Jung, I., & Yang, O. B. ZnO nanoflakes nanomaterials via hydrothermal process for dye sensitized solar cells. *Mater. Lett.* **2018**, 230, 92-95.
40. Mofdal, M. E., Osman, N. M., Khalifa, N. O., Eassa, N. A., Talib, N. H., & Albushra, H. A. (2018, August). The Effect of the Substrate Type on ZnO Nanoparticles Dye Sensitized Solar Cell. In 2018 Int. Conf. Comp. Cont. Ele. & Electr. Eng. (ICCCEEE) (pp. 1-4). IEEE.
41. Choi, S. C., & Sohn, S. H. Controllable hydrothermal synthesis of bundled ZnO nanowires using cerium acetate hydrate precursors. *Phys. E: Low-Dimens. Syst. Nanostructures* **2018**, 104, 98-100.
42. Patil, S. S., Tarwal, N. L., Yadav, H. M., Korade, S. D., Bhat, T. S., Teli, A. M., & Patil, P. S. Photoelectrochemical performance of dye and semiconductor sensitization on 1-D hollow hexagonal ZnO rods: a comparative study. *J Solid State Electrochem.* **2018**, 22(10), 3015-3024.
43. Sanjay, P., Deepa, K., Madhavan, J., & Senthil, S. Optical, spectral and photovoltaic characterization of natural dyes extracted from leaves of *Peltophorum pterocarpum* and

- Acalypha amentacea* used as sensitizers for ZnO based dye sensitized solar cells. *Opt. Mater.* **2018**, 83, 192-199.
44. Cheng, H., Wang, Y., Guo, P., & Yang, Z. High-Efficiency Dye-Sensitized Solar Cells Based on a ZnO Nanorod/Nanosheet Hierarchical Structure. *Energy Technol.* **2018**, 6(6), 1161-1167.
  45. Umar, M. I. A., Naumar, F. Y., Salleh, M. M., & Umar, A. A. Hydrothermally grown of well-aligned ZnONRs: dependence of alignment ordering upon precursor concentration. *J. Mater. Sci.: Mater. Electron.* **2018**, 29(8), 6892-6897.
  46. Ballal, R., Shinde, M., Waghadkar, Y., Arbuji, S., Rane, S., & Chauhan, R. (2018). Template-free hydrothermal synthesis of beaded nanochain bundles of ZnO and their application as photoanode in dye-sensitized solar cells. *J. Appl. Phys.* **2018**, 124(2), 203.
  47. Wu, T. L., Meen, T. H., Chao, S. M., Ji, L. W., Shih, L. C., Huang, C. H., & Wu, T. C. Application of ZnO micro rods on the composite photo-electrode of dye sensitized solar cells. *Microsyst. Technol.* **2018**, 24(1), 285-289.
  48. Das, P., Mondal, B., & Mukherjee, K. (2018). Improved efficiency of ZnO hierarchical particle based dye sensitized solar cell by incorporating thin passivation layer in photoanode. *J. Appl. Phys.* **2018**, 124(1), 80.
  49. Saleem, M., Ahmad, M. A., Fang, L., Raza, R., Akhtar, M. N., & Rehman, S. U. ( Solution-derived ZnO nanoflowers based photoelectrodes for dye-sensitized solar cells. *Mater. Res. Bull.* **2017**, 96, 211-217.
  50. Ibrayev, N. K., Ilyassov, B. R., & Afanasyev, D. A. Influence of the morphology of ZnO nanostructures on luminescent and photovoltaic properties. *Opt Spectrosc* **2017**, 122(3), 462-468.
  51. Sun, H., Sun, L., Sugiura, T., White, M. S., Stadler, P., Sariciftci, N. S., & Yoshida, T. Microwave-assisted hydrothermal synthesis of structure-controlled ZnO nanocrystals and their properties in dye-sensitized solar cells. *Electrochemistry* **2017**, 85(5), 253-261.
  52. Shaat, S., Zayed, H., Musleh, H., Shurrab, N., Issa, A., Asad, J., & Al Dahoudi, N. Inexpensive organic dyes-sensitized zinc oxide nanoparticles photoanode for solar cells devices. *J. Photonics Energy* **2017**, 7(2), 025504.
  53. Luo, Q. P., Wang, B., & Cao, Y. Single-crystalline porous ZnO nanosheet frameworks for efficient fully flexible dye-sensitized solar cells. *J. Alloys Compd.* **2017**, 695, 3324-3330.
  54. Marimuthu, T., Anandhan, N., Thangamuthu, R., & Surya, S. Influence of solution viscosity on hydrothermally grown ZnO thin films for DSSC applications. *Superlattices Microstruct.* **2016**, 98, 332-341.
  55. Wang, J. X., Yang, Y., & Sun, X. W. ZnO disk-like structures and their application in dye sensitized solar cell. *Solid State Commun.* **2016**, 240, 46-52.
  56. Qu, J., Zhu, Y., Chen, Z., Yuan, N. and Ding, J. Synthesis of ZnO nanomaterials with controlled morphology and their photoelectrochemical properties. *Russ. J. Phys. Chem. A* **2016**, 90(8), pp.1621-1627.



57. Zarghami, Z., Ramezani, M., & Motevalli, K. ZnO nanorods/nanoparticles: novel hydrothermal synthesis, characterization and formation mechanism for increasing the efficiency of dye-sensitized solar cells. *J. Clust. Sci.* **2016**, 27(4), 1451-1462.
58. Kanta, A. F., Schrijnemakers, A., & Decroly, A. Electrochemical characterisations of ZnO nanowires for dye-sensitised solar cells. *Mater. Des.* **2016**, 95, 481-485.
59. Xia, W., Mei, C., Zeng, X., Chang, S., Wu, G., & Shen, X. Mesoporous multi-shelled ZnO microspheres for the scattering layer of dye sensitized solar cell with a high efficiency. *Appl. Phys. Lett.* **2016**, 108(11), 113902.
60. Liu, W., Huang, Q., Huang, T., Cao, P., Han, S., Jia, F., ... & Lu, Y. "Secondary Growth" in Hydrothermal Synthesis of Aligned ZnO Nanostructures and Its Application in Dye-Sensitized Solar Cells. *J. Nanosci. Nanotechnol.* **2016**, 16(4), 4016-4022.
61. Al-Heniti, S., Umar, A., & Zaki, H. M. Synthesis and characterization of zinc oxide nanosheets for dye-sensitized solar cells. *J. Nanosci. Nanotechnol.* **2015**, 15(12), 9954-9959.
62. Roza, L., Fairuzy, K. A. J., Dewanta, P., Umar, A. A., Rahman, M. Y. A., & Salleh, M. M. Effect of molar ratio of zinc nitrate: hexamethylenetetramine on the properties of ZnO thin film nanotubes and nanorods and the performance of dye-sensitized solar cell (DSSC). *J. Mater. Sci.: Mater. Electron.* **2015**, 26(10), 7955-7966.
63. Umar, A. Growth of multipod ZnO architectures made by accumulation of hexagonal nanorods for dye sensitized solar cell (DSSC) application. *J. Nanosci. Nanotechnol.* **2015**, 15(9), 6801-6806.
64. Mansournia, M., Rafizadeh, S., & Hosseinpour-Mashkani, S. M. Hydrothermal synthesis, characterization and light harvesting applications of zinc oxide nanostructures. *J. Mater. Sci.: Mater. Electron.* **2015**, 26(8), 5839-5846.
65. Umar, A., Akhtar, M. S., Al-Assiri, M. S., Al-Hajry, A., Algarni, H., de Mendonça, V. R., & Rahman, Q. I. Highly porous ZnO nanosheets self-assembled in rosette-like morphologies for dye-sensitized solar cell application. *New J. Chem.* **2015**, 39(10), 7961-7970.
66. Dou, Y., Wu, F., Mao, C., Fang, L., Guo, S., & Zhou, M. Enhanced photovoltaic performance of ZnO nanorod-based dye-sensitized solar cells by using Ga doped ZnO seed layer. *J. Alloys Compd.* **2015**, 633, 408-414.
67. Liu, R., Xu, Y., Li, Z., Wang, X., Zhang, J., Ye, C., & Wang, H. ZnO nanorod multilayer film prepared by hydrothermal growth and its application in dye sensitised solar cells. *Mater. Res. Innov.* **2015**, 19(sup7), s11-s14.
68. Lai, F. I., Yang, J. F., & Kuo, S. Y. Efficiency enhancement of dye-sensitized solar cells' performance with ZnO nanorods grown by low-temperature hydrothermal reaction. *Mater.* **2015**, 8(12), 8860-8867.
69. Lin, L., Peng, X., Chen, S., Zhang, B., & Feng, Y. Preparation of diverse flower-like ZnO nanoaggregates for dye-sensitized solar cells. *RSC Adv.* **2015**, 5(32), 25215-25221.

70. Islavath, N., Ramasamy, E., Das, D., & Joshi, S. V. Spray coated seed layer for scalable synthesis of aligned ZnO nanowire arrays on FTO substrate and their photovoltaic properties. *Ceram* **2015**, 41(3), 4118-4122.
71. Zhuang, J., Dong, L., Li, L., Qin, H., & Wang, X. Preparation and Photoelectric Properties of ZnO Arrays with Top Hollow Pits. *Asian J. Chem.* **2014**, 26(24), 8277-8280.
72. Kilic, B., Günes, T., Besirli, I., Sezginer, M., & Tuzemen, S. Construction of 3-dimensional ZnO-nanoflower structures for high quantum and photocurrent efficiency in dye sensitized solar cell. *Appl. Surf. Sci.* **2014**, 318, 32-36.
73. Kiliç, B., Wang, L., Ozdemir, O., Lu, M., & Tüzemen, S. One-dimensional (1D) ZnO nanowires dye sensitized solar cell. *J. Nanosci. Nanotechnol.* **2013**, 13(1), 333-338.
74. Zhu, S., Tian, X., Chen, J., Shan, L., Xu, X., & Zhou, Z. A facile approach to construct multiple structured ZnO crystals by trisodium citrate-assisted hydrothermal growth toward performance enhancement of dye-sensitized solar cells. *J. Phys. Chem. C* **2014**, 118(30), 16401-16407.
75. Liu, L., Hong, K., Ge, X., Liu, D., & Xu, M. Controllable and rapid synthesis of long ZnO nanowire arrays for dye-sensitized solar cells. *J. Phys. Chem. C* **2014**, 118(29), 15551-15555.
76. Hossain, M. F., & Takahashi, T. Hydrothermal synthesis of novel ZnO Nanomushrooms for improving the solar cells performance. *IEEE TNANO.* **2014**, 13(4), 755-759.
77. Zheng, Y. Z., Ding, H., Liu, Y., Tao, X., Cao, G., & Chen, J. F. In situ hydrothermal growth of hierarchical ZnO nanourchin for high-efficiency dye-sensitized solar cells. *J. Power Sources* **2014**, 254, 153-160.
78. Senthil, T. S., Muthukumarasamy, N., & Kang, M. ZnO nanorods based dye sensitized solar cells sensitized using natural dyes extracted from beetroot, rose and strawberry. *Bull Korean Chem Soc* **2014**, 35(4), 1051.
79. Qu, J., Yang, Y., Wu, Q., Coxon, P. R., Liu, Y., He, X., & Ding, J. Hedgehog-like hierarchical ZnO needle-clusters with superior electron transfer kinetics for dye-sensitized solar cells. *RSC Adv* **2014**, 4(22), 11430-11437.
80. Mahpeykar, S. M., Koohsorkhi, J., & Ghafoori-Fard, H. Ultra-fast microwave-assisted hydrothermal synthesis of long vertically aligned ZnO nanowires for dye-sensitized solar cell application. *Nanotechnology* **2012**, 23(16), 165602.
81. Rao, A. R., & Dutta, V. Achievement of 4.7% conversion efficiency in ZnO dye-sensitized solar cells fabricated by spray deposition using hydrothermally synthesized nanoparticles. *Nanotechnology* **2008**, 19(44), 445712.
82. Krishna, J. V., Reddy, G., Devulapally, K., Islavath, N., & Giribabu, L. Solution processed aligned ZnO nanowires as anti-reflection and electron transport layer in organic dye-sensitized solar cells. *Opt. Mater.* **2019**, 95, 109243.
83. Gonzalez-Valls, I., & Lira-Cantu, M. Dye sensitized solar cells based on vertically-aligned ZnO nanorods: effect of UV light on power conversion efficiency and lifetime. *Energy Environ. Sci.* **2010**, 3(6), 789-795.

84. Tan, W. K., Lockman, Z., Abdul Razak, K., Kawamura, G., Muto, H., & Matsuda, A. Enhanced dye-sensitized solar cells performance of ZnO nanorod arrays grown by low-temperature hydrothermal reaction. *Int. J. Energy. Res.* **2013**, 37(15), 1992-2000.
85. Ameen, S., Akhtar, M. S., & Shin, H. S. Growth and characterization of nanospikes decorated ZnO sheets and their solar cell application. *Chem. Eng. Sci.* **2012**, 195, 307-313.
86. Ali, E. A. G. E., & Rezali, R. The effect of ZnO nanorod growth duration by hydrothermal deposition method to the photovoltaic properties. *AIP Conf. Proc.* **2012**, (Vol. 1502, No. 1, pp. 476-485).
87. Lim, S. K., Le, H. Q., Goh, G. K. L., Lin, K. K., & Dolmanan, S. B. Optimisation of zinc oxide nanorods for use in dye sensitised solar cells. *Mater. Res. Innov.* **2011**, 15(6), 401-405.
88. Lu, H., Dong, B., Zhao, L., Wang, S., Xu, Z., & Li, J. ZnO nanosheet-based hierarchical microarchitectures for enhanced conversion efficiency in dye-sensitized solar cells. *J. Mater. Sci.: Mater. Electron.* **2012**, 23(10), 1905-1909.
89. Li, Z., Zhou, Y., Xue, G., Yu, T., Liu, J., & Zou, Z. Fabrication of hierarchically assembled microspheres consisting of nanoporous ZnO nanosheets for high-efficiency dye-sensitized solar cells. *J. Mater. Chem.* **2012**, 22(29), 14341-14345.
90. Xi, Y., Wu, W. Z., Fang, H., & Hu, C. G. Integrated ZnO nanotube arrays as efficient dye-sensitized solar cells. *J. Alloys Compd.* **2012**, 529, 163-168.
91. Zhou, Y., Li, D., Zhang, X., Chen, J., & Zhang, S. Facile synthesis of ZnO micro-nanostructures with controllable morphology and their applications in dye-sensitized solar cells. *Appl. Surf. Sci.* **2012**, 261, 759-763.
92. Hu, X., Heng, B., Chen, X., Wang, B., Sun, D., Sun, Y., & Tang, Y. Ultralong porous ZnO nanobelt arrays grown directly on fluorine-doped SnO<sub>2</sub> substrate for dye-sensitized solar cells. *J. Power Sources* **2012**, 217, 120-127.
93. Guo, H., He, X., Hu, C., Tian, Y., Xi, Y., Chen, J., & Tian, L. Effect of particle size in aggregates of ZnO-aggregate-based dye-sensitized solar cells. *Electrochim. Acta* **2014**, 120, 23-29.
94. Meng, Y., Lin, Y., Lin, Y., Liu, G., & Zhang, X. Synthesis of hierarchical nanoparticles-based ZnO spheres for their application as the light blocking layers in dye-sensitized solar cells. *J. Mater. Sci.: Mater. Electron.* **2014**, 25(2), 1072-1079.
95. Cauda, V., Pugliese, D., Garino, N., Sacco, A., Bianco, S., Bella, F., & Gerbaldi, C. Multi-functional energy conversion and storage electrodes using flower-like Zinc oxide nanostructures. *Energy* **2014**, 65, 639-646.
96. Kuo, S. Y., Yang, J. F., & Lai, F. I. Improved dye-sensitized solar cell with a ZnO nanotree photoanode by hydrothermal method. *Nanoscale Res. Lett.* **2014**, 9(1), 206.
97. Zhu, S., Shan, L., Tian, X., Zheng, X., Sun, D., Liu, X., & Zhou, Z. Hydrothermal synthesis of oriented ZnO nanorod–nanosheets hierarchical architecture on zinc foil as flexible photoanodes for dye-sensitized solar cells. *Ceramics* **2014**, 40(8), 11663-11670.

98. Chen, L., Li, X., Qu, L., Gao, C., Wang, Y., Teng, F., & Xie, E. Facile and fast one-pot synthesis of ultra-long porous ZnO nanowire arrays for efficient dye-sensitized solar cells. *J. Alloys Compd.* **2014**, 586, 766-772.
99. Meng, Y., Lin, Y., Lin, Y., & Yang, J. Preparation and surface modification of hierarchical nanosheets-based ZnO microstructures for dye-sensitized solar cells. *J. Solid State Chem.* **2014**, 210(1), 160-165.
100. Patra, A. K., Dutta, A., & Bhaumik, A. Self-assembled ultra-small ZnO nanocrystals for dye-sensitized solar cell application. *J. Solid State Chem.* **2014**, 215, 135-142.
101. Fernández, A., Fan, J., & Cabot, A. Highly crystalline hydrothermal ZnO nanowires as photoanodes in DSCs. *Int. J. Nanotechnol.* **2014**, 11(9-1011), 747-757.
102. Tan, W. K., Lockman, Z., Abdul Razak, K., Kawamura, G., Muto, H., & Matsuda, A. Enhanced dye-sensitized solar cells performance of ZnO nanorod arrays grown by low-temperature hydrothermal reaction. *Int. J. Energy Res.* **2013**, 37(15), 1992-2000.
103. Meng, Y., Lin, Y., & Lin, Y. Synthesis of two-dimensional ZnO nanosheet-structures for the application in dye-sensitized solar cells. *J. Mater. Sci.: Mater. Electron.* **2013**, 24(12), 5117-5121.
104. Pugliese, D., Bella, F., Cauda, V., Lamberti, A., Sacco, A., Tresso, E., & Bianco, S. (2013). A chemometric approach for the sensitization procedure of ZnO flowerlike microstructures for dye-sensitized solar cells. *ACS Appl. Mater. Interfaces.* **2013**, 5(21), 11288-11295.
105. Kushwaha, S., & Bahadur, L. Studies of structural and morphological characteristics of flower-like ZnO thin film and its application as photovoltaic material. *Optik* **2013**, 124(22), 5696-5701.
106. Xiao, Z. H., Zhong, W., Xu, S. J., Luo, Y. P., & Wu, J. X. Investigation on the Photovoltaic Performance of ZnO Nanoarrays Prepared by Chemical Bath Deposition and Hydrothermal Method. *Appl Mech Mater* **2013**, (Vol. 395, pp. 170-173). Trans Tech Publications Ltd.
107. Kuo, S. Y., & Yang, J. F. The fabrication and characterization of dye-sensitized solar cells with ZnO nanorods. In 2013 Conference on Lasers and Electro-Optics Pacific Rim **2013**, (pp. 1-2). IEEE.
108. Xiao, Z. H., Zhong, W., Xu, S. J., & Luo, Y. P. Hydrothermal Preparation and Characterization of ZnO with Various Morphologies for Dye-Sensitized Solar Cells. *Adv Mat Res.* **2013**, (Vol. 750, pp. 873-876). Trans Tech Publications Ltd.
109. Senthil, T. S., Kim, A. Y., Muthukumarasamy, N., & Kang, M. Effect of bath temperature on the performance of ZnO nanorod-based thin film solar cells. *J. Nanoparticle Res.* **2013**, 15(9), 1926.
110. Thambidurai, M., Muthukumarasamy, N., Velauthapillai, D., Arul, N. S., Agilan, S., & Balasundaraprabhu, R. Dye-sensitized ZnO nanorod based photoelectrochemical solar cells with natural dyes extracted from *Ixora coccinea*, Mulberry and Beetroot. *J. Mater. Sci.: Mater. Electron.* **2011**, 22(11), 1662-1666.
111. Thambidurai, M., Muthukumarasamy, N., Velauthapillai, D., Arul, N. S., Agilan, S., & Balasundaraprabhu, R. Dye-sensitized ZnO nanorod based photoelectrochemical solar cells

- with natural dyes extracted from *Ixora coccinea*, Mulberry and Beetroot. *J. Mater. Sci.: Mater. Electron.* **2011**, 22(11), 1662-1666.
112. Saleem, M., Fang, L., Wu, F., Jun, L. W., Xu, C. L., & Xue, S. J. Fabrication, Characteristics and Application in Dye-sensitized Solar cell of Vertically Alligned ZnO nanorod arrays Guided with Polyethyleneimine via hydrothermal Method. *Adv Mat Res.* **2011**, (Vol. 705, pp. 120-125). Trans Tech Publications Ltd.
  113. Zhitao, H., Sisi, L., Junjun, L., Jinkui, C., & Yong, C. Facile synthesis of ZnO nanowires on FTO glass for dye-sensitized solar cells. *J. Semicond.* **2013**, 34(7), 074002.
  114. Schlur, L., Carton, A., Lévêque, P., Guillon, D., & Pourroy, G. Optimization of a new ZnO nanorods hydrothermal synthesis method for solid state dye sensitized solar cells applications. *J. Phys. Chem. C* **2013**, 117(6), 2993-3001.
  115. Senthil, T. S., Muthukumarasamy, N., & Kang, M. Applications of highly ordered paddle wheel like structured ZnO nanorods in dye sensitized solar cells. *Mater. Lett.* **2013**, 102, 26-29.
  116. Zhu, S., Chen, X., Zuo, F., Jiang, M., Zhou, Z., & Hui, D. Controllable synthesis of ZnO nanograss with different morphologies and enhanced performance in dye-sensitized solar cells. *J. Solid State Chem.* **2013**, 197, 69-74.
  117. Hossain, M. F., Takahashi, T., & Biswas, S. Nanorods and nanolipsticks structured ZnO photoelectrode for dye-sensitized solar cells. *Electrochem. Commun.* **2009**, 11(9), 1756-1759.
  118. Qin, Z., Huang, Y., Liao, Q., Zhang, Z., & Zhang, Y. Effect of surface modifications on ZnO nanorod arrays electrode for dye-sensitized solar cells. *J. Nanosci. Nanotechnol.* **2012**, 12(1), 463-468.
  119. Qin, Z., Huang, Y., Qi, J., Li, H., Su, J., & Zhang, Y. Facile synthesis and photoelectrochemical performance of the bush-like ZnO nanosheets film. *Solid State Sci.* **2012**, 14(1), 155-158.
  120. Yang, W., Wang, Y., Zhen, Q., & Shi, W. Effect of growth time on morphology and photovoltaic properties of ZnO nanowire array films. *Rare Metals* **2011**, 30(6), 676-680.
  121. Luo, Q. P., Lei, B. X., Yu, X. Y., Kuang, D. B., & Su, C. Y. Hierarchical ZnO rod-in-tube nano-architecture arrays produced via a two-step hydrothermal and ultrasonication process. *J. Mater. Chem.* **2011**, 21(24), 8709-8714.
  122. Dhas, V., Muduli, S., Lee, W., Han, S. H., & Ogale, S. Enhanced conversion efficiency in dye-sensitized solar cells based on ZnO bifunctional nanoflowers loaded with gold nanoparticles. *Appl. Phys. Lett.* **2008**, 93(24), 243108.
  123. Xie, Y., Li, S., Zhang, T., Joshi, P., Fong, H., Ropp, M., & Qiao, Q. Dye-sensitized solar cells based on ZnO nanorod arrays. In *Organic Photovoltaics IX* **2008**, (Vol. 7052, p. 705213).
  124. Gao, H., Fang, G., Wang, M., Liu, N., Yuan, L., Li, C., & Zhao, X. The effect of growth conditions on the properties of ZnO nanorod dye-sensitized solar cells. *Mater, Res, Bull.* **2008**, 43(12), 3345-3351.



125. Wang, J. X., Cheung, W. S., & Wu, C. M. L. Porous ZnO hierarchical disk nanostructures dye sensitive solar cell. In 2008 IEEE International Conference on Electron Devices and Solid-State Circuits 2008, (pp. 1-4). IEEE.
126. Wang, Y. X., Ma, T. L., Fan, X. Y., & Li, X. Y. Fabrication and characterization of dye-sensitized solar cell with different microstructure ZnO. *Mater. Sci. Forum* **2011**, (Vol. 663, pp. 857-860). Trans Tech Publications Ltd.
127. Chao, C. H., Chan, C. H., Huang, J. J., Chang, L. S., & Shih, H. C. Manipulated the band gap of 1D ZnO nano-rods array with controlled solution concentration and its application for DSSCs. *Curr Appl Phys* **2011**, 11(1), S136-S139.
128. Qin, Z., Liao, Q., Huang, Y., Tang, L., Zhang, X., & Zhang, Y. Effect of hydrothermal reaction temperature on growth, photoluminescence and photoelectrochemical properties of ZnO nanorod arrays. *Mater. Chem. Phys.* **2010**, 123(2-3), 811-815.
129. Wang, J. X., Wu, C. M. L., Cheung, W. S., Luo, L. B., He, Z. B., Yuan, G. D., & Lee, S. T. Synthesis of hierarchical porous ZnO disklike nanostructures for improved photovoltaic properties of dye-sensitized solar cells. *J. Phys. Chem. C* **2010**, 114(31), 13157-13161.
130. Chung, J., Lee, J., & Lim, S. (2010). Annealing effects of ZnO nanorods on dye-sensitized solar cell efficiency. *Phys. B: Condens. Matter* **2010**, 405(11), 2593-2598.
131. Qiu, J., Li, X., Zhuge, F., Gan, X., Gao, X., He, W., & Hwang, Y. H. Solution-derived 40  $\mu\text{m}$  vertically aligned ZnO nanowire arrays as photoelectrodes in dye-sensitized solar cells. *Nanotechnology* **2010**, 21(19), 195602.
132. Wang, C., Zhang, X., Wang, D., Yang, Z., Ji, W., Zhang, C., & Zhao, Y. Synthesis of nanostructural ZnO using hydrothermal method for dye-sensitized solar cells. *Sci. China Technol. Sci.* **2010**, 53(4), 1146-1149.
133. Lupan, O., Guerin, V. M., Tiginyanu, I. M., Ursaki, V. V., Chow, L., Heinrich, H., & Pauporté, T. Well-aligned arrays of vertically oriented ZnO nanowires electrodeposited on ITO-coated glass and their integration in dye sensitized solar cells. *J. Photochem. Photobiol.* **2010**, 211(1), 65-73.
134. Qiu, Y., Chen, W., & Yang, S. Facile hydrothermal preparation of hierarchically assembled, porous single-crystalline ZnO nanoplates and their application in dye-sensitized solar cells. *J. Mater. Chem.* **2010**, 20(5), 1001-1006.
135. Yang, W., Wan, F., Chen, S., & Jiang, C. Hydrothermal growth and application of ZnO nanowire films with ZnO and TiO<sub>2</sub> buffer layers in dye-sensitized solar cells. *Nanoscale. Res. Lett.* **2009**, 4(12), 1486.
136. Tan, W. K., Lockman, Z., Abdul Razak, K., Kawamura, G., Muto, H., & Matsuda, A. Enhanced dye-sensitized solar cells performance of ZnO nanorod arrays grown by low-temperature hydrothermal reaction. *Int. J. Energy Res.* **2013**, 37(15), 1992-2000.
137. Fang, X., Li, Y., Zhang, S., Bai, L., Yuan, N., & Ding, J. The dye adsorption optimization of ZnO nanorod-based dye-sensitized solar cells. *J. Sol. Energy* **2014**, 105, 14-19.

138. Fan, J., Hao, Y., Munuera, C., Garcia-Hernandez, M., Güell, F., Johansson, E. M., & Cabot, A. Influence of the annealing atmosphere on the performance of ZnO nanowire dye-sensitized solar cells. *J. Phys. Chem. C* **2013**, 117(32), 16349-16356.
139. Wahyuono, R. A., Schmidt, C., Dellith, A., Dellith, J., Schulz, M., Seyring, M., & Dietzek, B. ZnO nanoflowers-based photoanodes: aqueous chemical synthesis, microstructure and optical properties. *Open Chem.* **2016**, 14(1), 158-169.
140. Rouhi, J., Mamat, M. H., Ooi, C. R., Mahmud, S., & Mahmood, M. R. High-performance dye-sensitized solar cells based on morphology-controllable synthesis of ZnO–ZnS heterostructure nanocone photoanodes. *PLoS One* **2015**, 10(4), e0123433.
141. Mou, J., Zhang, W., Fan, J., Deng, H., & Chen, W. Facile synthesis of ZnO nanobullets/nanoflakes and their applications to dye-sensitized solar cells. *J. Alloys Compd.* **2011**, 509(3), 961-965.
142. Lee, C. P., Lin, J. C., Wang, Y. C., Chou, C. Y., Yeh, M. H., Vittal, R., & Ho, K. C. Synthesis of hexagonal ZnO clubs with opposite faces of unequal dimensions for the photoanode of dye-sensitized solar cells. *Phys. Chem. Chem. Phys* **2011**, 13(47), 20999-21008.
143. McCune, M., Zhang, W., & Deng, Y. High efficiency dye-sensitized solar cells based on three-dimensional multilayered ZnO nanowire arrays with “caterpillar-like” structure. *Nano Lett.* **2012**, 12(7), 3656-3662.
144. Devabharathi, V., Palanisamy, K. L., & Sundaram, N. M. Influence of pH on the performance of ZnO nanocrystal based dye sensitized solar cells. *Superlattices Microstruct.* **2014**, 75, 99-104.
145. Umar, A., Akhtar, M. S., Al-Hajry, A., Al-Assiri, M. S., & Almehbad, N. Y. Hydrothermally grown ZnO nanoflowers for environmental remediation and clean energy applications. *Mater. Res. Bull.* **2012**, 47(9), 2407-2414.
146. Ameen, S., Akhtar, M. S., Kim, Y. S., Yang, O. B., & Shin, H. S. Influence of seed layer treatment on low temperature grown ZnO nanotubes: Performances in dye sensitized solar cells. *Electrochim Acta* **2012**, 56(3), 1111-1116.
147. Tian, Y., Hu, C., Wu, Q., Wu, X., Li, X., & Hashim, M. Investigation of the fill factor of dye-sensitized solar cell based on ZnO nanowire arrays. *Appl. Surf. Sci.* **2011**, 258(1), 321-326.
148. Cakir, A. C., & Erten-Ela, S. Comparison between synthesis techniques to obtain ZnO nanorods and its effect on dye sensitized solar cells. *Adv. Powder Technol.* **2012**, 23(5), 655-660.
149. Lin, L. Y., Yeh, M. H., Lee, C. P., Chou, C. Y., & Ho, K. C. Flexible dye-sensitized solar cells with one-dimensional ZnO nanorods as electron collection centers in photoanodes. *Electrochim Acta* **2013**, 88, 421-428.
150. Thambidurai, M., Muthukumarasamy, N., Velauthapillai, D., & Lee, C. Synthesis of garland like ZnO nanorods and their application in dye sensitized solar cells. *Mater. Lett.* **2013**, 92, 104-107.

151. Thambidurai, M., Muthukumarasamy, N., Velauthapillai, D., & Lee, C. Rosa centifolia sensitized ZnO nanorods for photoelectrochemical solar cell applications. *J. Sol. Energy* **2014**, 106, 143-150.
152. Chae, Y., Kim, S. J., Kim, J. H., & Kim, E. Metal-free organic-dye-based flexible dye-sensitized solar textiles with panchromatic effect. *Dyes Pigm.* **2015**, 113, 378-389.
153. J. Han, M. Kamber and J. Pei Data Mining Concept and Techniques, 3rd Edition, MK Publishers, **2014**
154. G. Bonaccorso, Machine learning algorithms, Packt Publishing Ltd., **2017**.
